# Supplementary material
Source: MDPI journal article supplement (https://www.mdpi.com/2079-6412/13/11/1949)
Supplement: s1 [file s1]

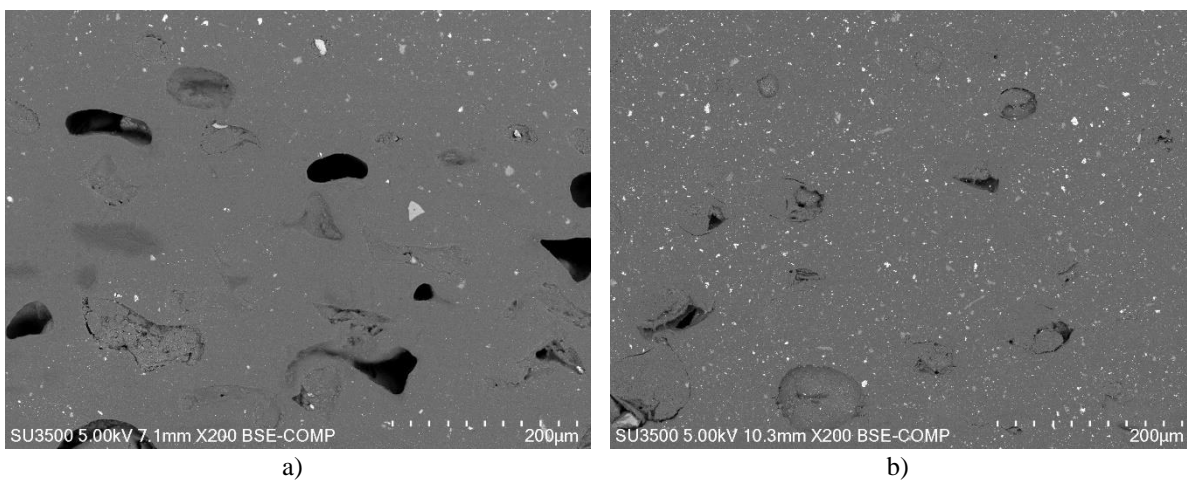

Figure S1: SEM images in backscattered mode for a sample of FBE (cross-section) a) before ageing and b) after 12 months of ageing at pH 14. The holes are due to the polishing step.

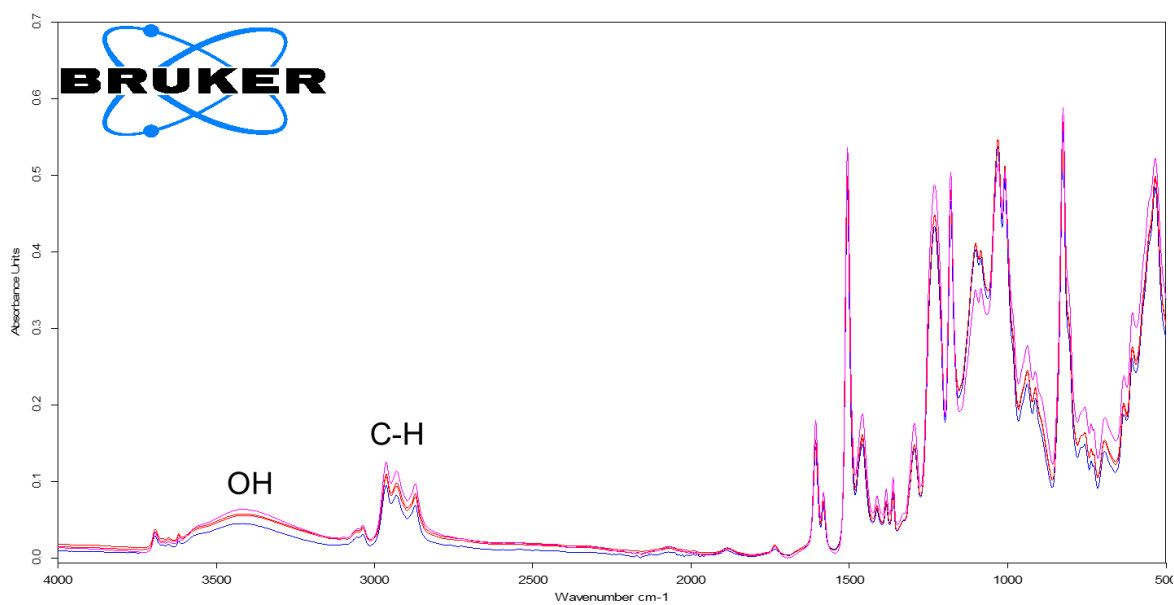

Figure S2: Infrared spectra of the tested liquid epoxy after six months of exposure in pH 13.
